# Supplementary material for: Postarrest stalling rather than crawling favors CD8+ over CD4+ T‐cell migration across the blood–brain barrier under flow in vitro
Source: PubMed Central journal article supplement — Eur J Immunol. 2016 Jul 22;46(9):2187–203. doi: 10.1002/eji.201546251 (PMC5113696; doi:10.1002/eji.201546251), 2016-07-22
Supplement: EJI-46-2187-s001.pdf [file EJI-46-2187-s001.pdf]

# European Journal of Immunology

Supporting Information

for

DOI 10.1002/eji.201546251

Henriette Rudolph, Armelle Klopstein, Isabelle Gruber, Claudia Blatti, Ruth Lyck  
and Britta Engelhardt

**Postarrest stalling rather than crawling favors CD8<sup>+</sup> over CD4<sup>+</sup> T-cell migration  
across the blood–brain barrier under flow in vitro**

## **Supporting Information**

### **Post-arrest stalling rather than crawling favors CD8<sup>+</sup> over CD4<sup>+</sup> T-cell migration across the blood-brain barrier under flow in vitro**

Henriette Rudolph, Armelle Klopstein, Isabelle Gruber, Claudia Blatti, Ruth Lyck, Britta Engelhardt

For information regarding the study please contact [bengel@tki.unibe.ch](mailto:bengel@tki.unibe.ch)

**Supporting Information Figure 1: Comparable antigen-specific T-cell proliferation of CD8<sup>+</sup> and CD4<sup>+</sup> T cells**

Proliferation of CD8<sup>+</sup> and CD4<sup>+</sup> T cells upon stimulation with OVA peptide 257-264 and OVA 323-339 respectively, was assessed via the incorporation of <sup>3</sup>H-Thymidine. Data are shown as mean ± SEM. One representative experiment out of 4 is shown with bars showing triplicates assessed with the cell preparations OT1\_3 and OT2\_2.

# Supporting Information Figure 2

**A**

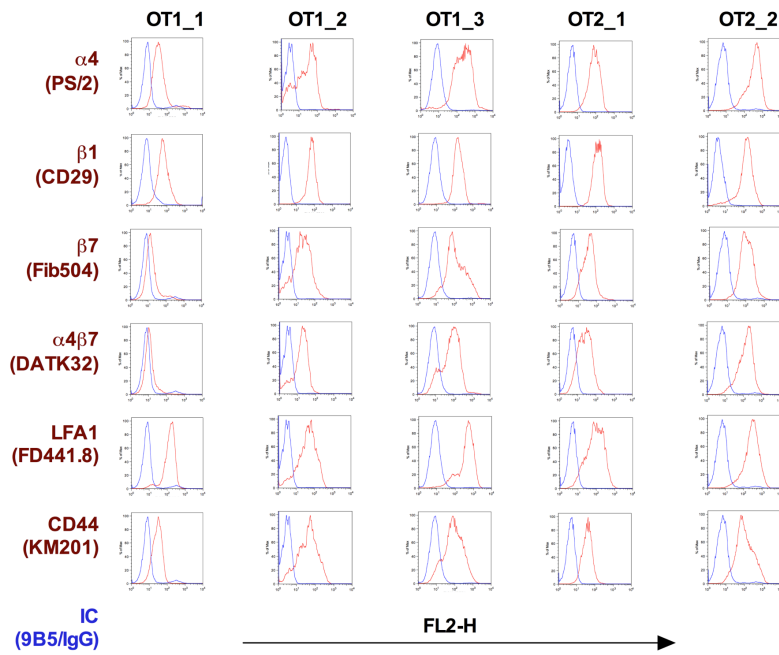

**B**

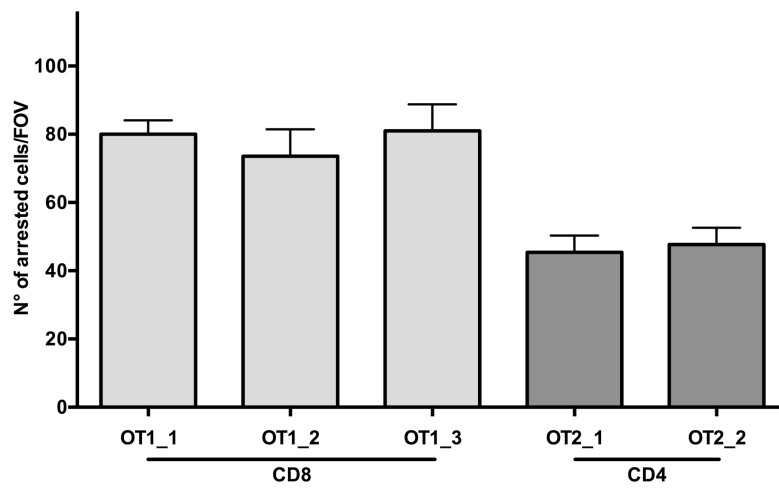

**C**

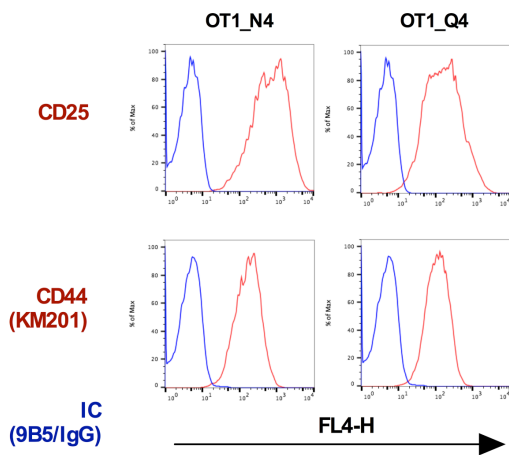

**D**

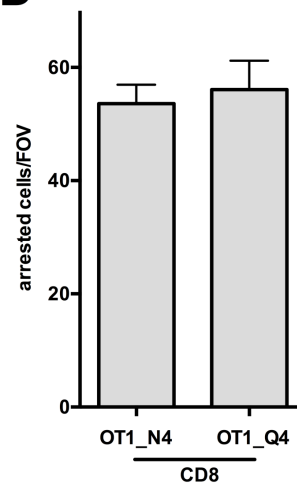

**Supporting Information Figure 2: Comparable phenotype and shear resistant arrest of different CD8<sup>+</sup> and CD4<sup>+</sup> T-cell preparations**

(A) Flow cytometry analysis of cell surface expression of LFA-1 ( $\alpha$ L),  $\alpha$ 4-,  $\beta$ 1-,  $\beta$ 7- integrin subunits and  $\alpha$ 4 $\beta$ 7-integrin as ligands for ICAM-1, ICAM-2 and VCAM-1, respectively and for CD44 as an activation marker (red lines) for different CD8<sup>+</sup> and CD4<sup>+</sup> T-cell preparations is shown. Isotype control staining is shown as blue lines. Data are from representative experiments out of five CD8<sup>+</sup> and four CD4<sup>+</sup> T-cell preparations used for the experiments. Histograms from light scatter gated live cells are shown. (B) Comparison of the shear resistant arrest of 3 different CD8<sup>+</sup> and 2 different CD4<sup>+</sup> T-cell preparations is shown. OT1 = CD8<sup>+</sup> T cells, OT2 = CD4<sup>+</sup> T-cell lines. Bars show mean numbers  $\pm$  SEM of arrested CD8<sup>+</sup> or CD4<sup>+</sup> T cells per FOV (865.5  $\mu$ m x 647.7  $\mu$ m) perfused in a 1:1 ratio on TNF- $\alpha$ +IFN- $\gamma$  stimulated pMBMECs. (C) Flow cytometry analysis of cell surface staining for CD25 and CD44 as activation markers of CD8<sup>+</sup> T cells stimulated with the high affinity OVA peptide N4 (OT1\_N4) or the lower affinity peptide Q4 (OT1\_Q4) (red lines). Isotype control staining is shown as blue lines. (D) Mean numbers OT1\_N4 or OT1\_Q4 per FOV (438  $\mu$ m x 329  $\mu$ m) perfused in a 1:1 ratio arrested on TNF- $\alpha$ +IFN- $\gamma$  co-stimulated pMBMECs. Data are shown as mean  $\pm$  SEM (n=10 experiments). The number of perfused T cells was 0,65x10<sup>6</sup>/ml in contrast to 0,85x10<sup>6</sup>/ml in the other movie experiments.

**Supporting Information Figure 3: G $\alpha$ i-dependent G-protein coupled receptor (GPCR) signalling is not required for shear resistant arrest and crawling of activated CD4<sup>+</sup> and CD8<sup>+</sup> T cells on pMBMECs**

T cells were pre-treated with PTX for 1 hour in a concentration for 1 $\mu$ g/ml to inhibit G $\alpha$ i dependent GPCR mediated inside-out integrin activation on their surface. As a control, T cells were pretreated with PTX-B which lacks Gi-inhibitory activity, but confers cell-surface binding specificity. (A) Mean numbers of PTX-pretreated CD8<sup>+</sup> versus CD4<sup>+</sup> T cells per FOV (438  $\mu$ m x 329  $\mu$ m) perfused in a 1:1 ratio arrested on TNF- $\alpha$ +IFN- $\gamma$  co-stimulated pMBMECs. Data are shown as mean  $\pm$  SEM (n=3 experiments). (B) Each T cell was assigned to one of 6 categories which are shown in the staple bars

as follows: Graphs to the left: Stalling with diapedesis (black), stalling (dark grey) and stalling with detachment (light grey); Graphs to the right: crawling with diapedesis (black), crawling (dark grey) and crawling with detachment (light grey). The number of arrested T cells per FOV was set to 100% and the 6 categories are displayed in percent as fraction of arrested T cells. Bars show means  $\pm$  SEM. Differences between crawling PTX-pretreated CD8<sup>+</sup>/ CD4<sup>+</sup> T cells versus crawling PTX-B-pretreated CD8<sup>+</sup>/ CD4<sup>+</sup> T cells and stalling PTX-pretreated CD8<sup>+</sup>/ CD4<sup>+</sup> T cells versus stalling PTX-B-pretreated CD8<sup>+</sup>/ CD4<sup>+</sup> T cells were significant ( $p=0,02$  for CD8<sup>+</sup> T cells / $p=0,0032$  for CD4<sup>+</sup> T cells). (C) Percentage of overall CD4<sup>+</sup> and CD8<sup>+</sup> T-cell diapedesis irrespective of prior crawling or stalling is shown. One-way ANOVA, followed by the Tukey multiple-comparison test. The diapedesis rates of crawling and stalling CD4<sup>+</sup> versus CD8<sup>+</sup> T cells pretreated with PTX or PTX-B did not differ significantly.

## Supporting Information Figure 4

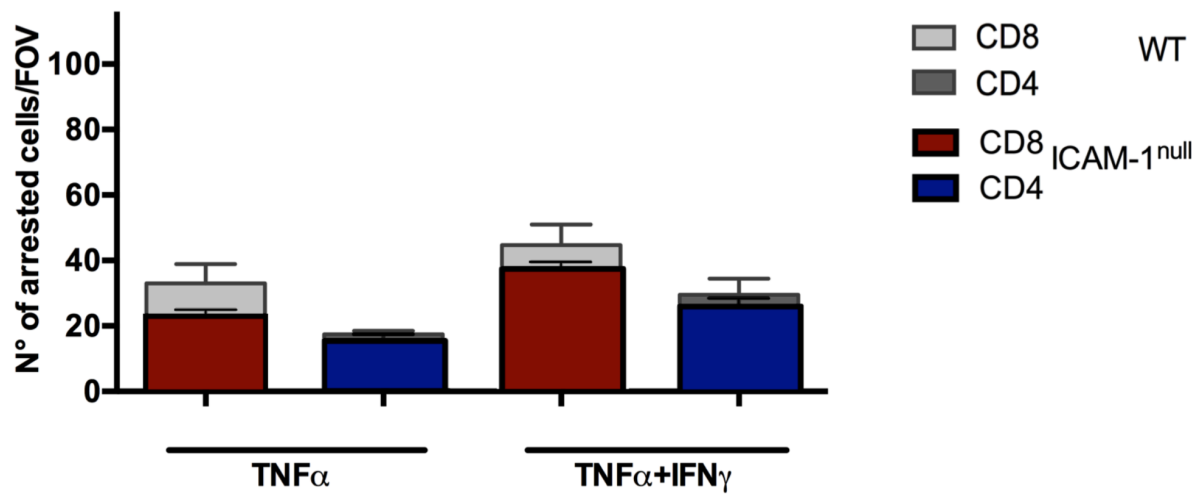

### Supporting Information Figure 4: Involvement of endothelial ICAM-1 in increased shear resistant arrest of CD8<sup>+</sup> T cells compared to CD4<sup>+</sup> T cells on pMBMECs

Mean numbers of arrested CD8<sup>+</sup> T cells (red bars) and CD4<sup>+</sup> T cells (blue bars) per FOV on ICAM-1<sup>null</sup> pMBMECs perfused in a 1:1 ratio are shown on TNF- $\alpha$ -stimulated (TNF- $\alpha$ ) and TNF- $\alpha$  and IFN- $\gamma$  co-stimulated (TNF- $\alpha$ +IFN- $\gamma$ ) ICAM-1<sup>null</sup> pMBMECs. The respective T-cell arrest on WT pMBMECs (WT) always compared within the same assay is shown in the background in greyscale. Data are shown as mean  $\pm$  SEM (n=11 for TNF- $\alpha$ , n=18 for TNF- $\alpha$ +IFN- $\gamma$ ). One-way ANOVA, followed by the Tukey multiple-comparison test. The number of perfused T cells on pMBMEC monolayers was  $0,65 \times 10^6$ /ml in contrast to  $0,85 \times 10^6$ /ml in the other movie experiments.



## Supporting Information Figure 5

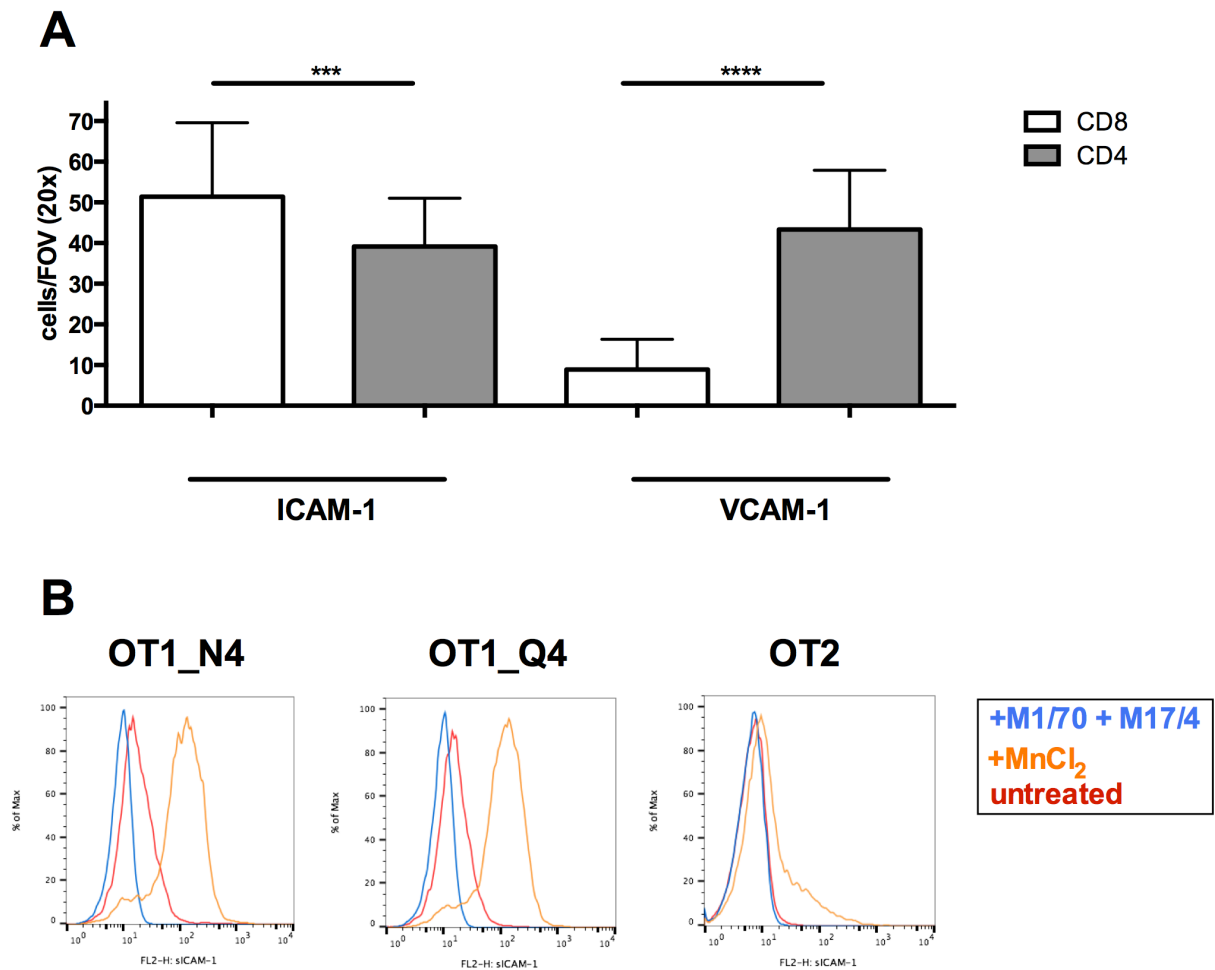

### Supporting Information Figure 5: Binding of activated CD8<sup>+</sup> and CD4<sup>+</sup> T cells to immobilized ICAM-1 and VCAM-1 and soluble ICAM-1

(A) Bars show numbers  $\pm$  SD of activated CD8<sup>+</sup> and CD4<sup>+</sup> T cells arrested on recombinant mouse ICAM-1 and VCAM-1 under static conditions assessed with the following T-cell lines: OT1\_1, OT1\_2 and OT2\_1. \*\*\* $p$  = 0.0001; \*\*\*\* $p$  < 0.0001; One-way ANOVA, followed by the Tukey multiple-comparison test. (B) Flow cytometry analysis showing binding of soluble ICAM-1 on OT1\_N4, OT1\_Q4 and OT2 T cells. Untreated T cells are shown in red, T cells pretreated with the  $\beta$ 2-integrin function blocking antibodies M1/70 and M17/4 are shown in blue (negative control) and T cells pretreated with MnCl<sub>2</sub> (positive control) are shown in orange.

**Supporting Information video 1: Number of arrested T cells which are stalling or start crawling on NS wt pMBMEC.**

Representative time-lapse movie that shows the interaction of activated CD8<sup>+</sup> and CD4<sup>+</sup> T cells on NS pMBMECs under flow over 20 minutes. Images were taken every 10 seconds and the movie is composed at 6 frames per second (fps). Arrows indicate direction of shear flow (original magnification 20x). The upper time displays the time after start of the movie whereas the lower displays the time of movie acquisition with the enhanced shear. The movie corresponds to experiments analyzed in Figures 1, 2 and 3. Fig. 1B shows one frame of this movie. CD8<sup>+</sup> T cells are labeled in green and CD4<sup>+</sup> T cells are labeled in red. Arrested T cells can be seen to stall or to start crawling.

**Supporting Information video 2: Number of arrested T cells which are stalling or start crawling on wt pMBMEC stimulated with TNF- $\alpha$ .**

Representative time-lapse movie that shows the interaction of activated CD8<sup>+</sup> and CD4<sup>+</sup> T cells on TNF- $\alpha$  stimulated pMBMECs. Arrows indicate direction of shear flow (original magnification 20x). The upper time displays the time after start of the movie whereas the lower displays the time of movie acquisition with the enhanced shear. Video acquisition was performed as described for Video 1. The movie corresponds to experiments analyzed in Figures 1, 2 and 3. Fig. 1B shows one frame of this movie. CD8<sup>+</sup> T cells are labeled in green and CD4<sup>+</sup> T cells are labeled in red. Arrested T cells either started to crawl or stalled. Diapedesis events can be seen when cells on top of the pMBMEC monolayer (visible as phase-contrast bright) change to below the monolayer (visible as phase-contrast dark). CD8<sup>+</sup> T-cell diapedesis can be observed in the lower right segment of the movie starting at minute 06:44 and is accomplished until minute 10:44 during acquisition of the movie. Quantification of the different T-cell behavioral categories is shown in Fig. 2B. Cell death of an endothelial cell can be observed but was only observed very rare during the live-time movies in the condition wt pMBMEC stimulated with TNF- $\alpha$ .

**Supporting Information video 3 Number of arrested T cells which are stalling or start crawling on wt pMBMEC stimulated with TNF- $\alpha$ +IFN- $\gamma$ .**

Representative time-lapse movie that shows the interaction of activated CD8<sup>+</sup> and CD4<sup>+</sup> T cells on TNF- $\alpha$ +IFN- $\gamma$  stimulated pMBMECs. Arrows indicate direction of shear flow (original magnification

20x). The upper time displays the time after start of the movie whereas the lower displays the time of movie acquisition with the enhanced shear. Video acquisition and analysis were performed as described for Videos 1 and 2. The following 6 categories were distinguished: i) Stalling T cells detaching during the observation period (dark blue), ii) T cells remaining stalled (green) and iii) stalling T cells that crossed the pMBMEC monolayer in the observation period (red), iv) T cells which crawled and detached (light blue), v) T cells which crawled for the entire observation period and finally (pink) vi) T cells which crossed the pMBMEC monolayer after crawling (yellow). The sequential appearance of the individual tracks is as follows: red (center, left), light blue (top right), pink (center), dark blue (center lower part), yellow (center) and green (top right). The movie corresponds to experiments analyzed in Figures 1, 2 and 3. Fig. 1B shows one frame of this movie. CD8<sup>+</sup> T cells are labeled in red and CD4<sup>+</sup> T cells are labeled in green.

**Supporting information video 4: Paracellular diapedesis of activated CD8<sup>+</sup> T cells across the inflamed BBB.** Representative time-lapse movie showing a paracellular diapedesis event of an activated CD8<sup>+</sup> T cell on pMBMECs stimulated with TNF- $\alpha$ +IFN- $\gamma$ . Arrow indicates the site of diapedesis that correlates with a break of the GFP signal. Close-up of a 63x magnification with glycerol immersion. scale bar = 5 $\mu$ m.

**Supporting information video 5: Transcellular diapedesis of activated CD8<sup>+</sup> T cells across the inflamed BBB.** Representative time-lapse movie showing a transcellular diapedesis of an activated CD8<sup>+</sup> T cell on inflamed BBB stimulated by TNF- $\alpha$ +IFN- $\gamma$ . Arrow indicated the site of diapedesis. Note that the GFP signal stays intact. Close-up of a 63x magnification with glycerol immersion. scale bar = 5 $\mu$ m.

**Supporting Information video 6: Number of arrested T cells which are stalling or start crawling on NS ICAM-1<sup>null</sup>/ICAM-2<sup>-/-</sup> pMBMECs.**

Representative time-lapse movie that shows the interaction of activated CD8<sup>+</sup> and CD4<sup>+</sup> T cells on NS pMBMECs. Arrows indicate direction of shear flow (original magnification 20x). The upper time displays the time after start of the movie whereas the lower displays the time of movie acquisition with the enhanced shear. Video acquisition and analysis were performed as described for Videos 1 and 2.

The movie corresponds to experiments analyzed in Fig. 6. Fig. 6B is a preview of this movie. CD8<sup>+</sup> T cells are labeled in red and CD4<sup>+</sup> T cells are labeled in green.

**Supporting Information video 7: Number of arrested T cells which are stalling or start crawling on ICAM-1<sup>null</sup>/ICAM-2<sup>-/-</sup> pMBMEC stimulated with TNF- $\alpha$ .**

Representative time-lapse movie that shows the interaction of activated CD8<sup>+</sup> and CD4<sup>+</sup> T cells on TNF- $\alpha$  stimulated pMBMECs. Arrows indicate direction of shear flow (original magnification 20x). The upper time displays the time after start of the movie whereas the lower displays the time of movie acquisition with the enhanced shear. Video acquisition and analysis were performed as described for Videos 1 and 2. The movie corresponds to experiments analyzed in Fig. 6. Fig. 6B is a preview of this movie. CD8<sup>+</sup> T cells are labeled in green and CD4<sup>+</sup> T cells are labeled in red.

**Supporting Information video 8: Number of arrested T cells which are stalling or start crawling on ICAM-1<sup>null</sup>/ICAM-2<sup>-/-</sup> pMBMEC stimulated with TNF- $\alpha$ +IFN- $\gamma$ .**

Representative time-lapse movie that shows the interaction of activated CD8<sup>+</sup> and CD4<sup>+</sup> T cells on TNF- $\alpha$ +IFN- $\gamma$  stimulated pMBMECs. Arrows indicate direction of shear flow (original magnification 20x). The upper time displays the time after start of the movie whereas the lower displays the time of movie acquisition with the enhanced shear. Video acquisition and analysis were performed as described for Videos 1 and 2. The movie corresponds to experiments analyzed in Fig. 6. Fig. 6B is a preview of this movie. CD8<sup>+</sup> T cells are labeled in green and CD4<sup>+</sup> T cells are labeled in red.

**Supporting Information Table 1: Adhesion molecule phenotype of different CD( and CD4 T cell preparations - Mean fluorescent intensities**

|                                                         | OT1_1      | OT1_4      | OT1_7      | OT2_1      | OT2_3     |
|---------------------------------------------------------|------------|------------|------------|------------|-----------|
| <b><math>\alpha</math>4 (PS/2)</b>                      | 8.8; 36.8  | 2.83; 19.3 | 8.13; 190  | 4.71; 80.1 | 6.82; 321 |
| <b><math>\beta</math>1 (CD29)</b>                       | 8.27; 60.5 | 2.22; 66.1 | 17; 157    | 2.95; 126  | 3.92; 121 |
| <b><math>\beta</math>7 (Fib 504)</b>                    | 8.8; 15.6  | 2.83; 18.8 | 8.13; 123  | 4.71; 36.2 | 6.82; 112 |
| <b><math>\alpha</math>4<math>\beta</math>7 (DATK32)</b> | 8.8; 11.4  | 2.83; 14.6 | 8.13; 65.7 | 4.71; 23.6 | 6.82; 132 |
| <b>LFA1 (FD441.8)</b>                                   | 8.8; 135   | 2.83; 38.6 | 8.13; 370  | 4.71; 83.6 | 6.82; 272 |
| <b>CD44 (KM201)</b>                                     | 8.8; 27.4  | 2.83; 37.3 | 8.13; 83,7 | 4.71; 38.4 | 6.82; 107 |
| <b>IC (9B5/ IgG)</b>                                    |            |            |            |            |           |

Mean Fluorescence intensity (MFI) values of flow cytometry analysis of cell surface expression of  $\alpha$ L-,  $\alpha$ 4-,  $\beta$ 1-,  $\beta$ 7- integrin subunits and  $\alpha$ 4 $\beta$ 7-integrin as ligands for ICAM-1, ICAM-2 and VCAM-1 respectively and for CD44 as an activation maker (red values) for different CD8<sup>+</sup> and CD4<sup>+</sup> T cell preparations are shown. MFI of the isotype control staining is shown as blue values. Data show of MFIs representative experiments out of a total of five CD8<sup>+</sup> and four CD4<sup>+</sup> T cell preparations used for the experiments. For further information please see also Supporting Information Fig.2.
